# Supplementary material for: A pyrene-bridged macrocage showing no excimer fluorescence
Source: Royal Society of Chemistry journal article supplement (doi:10.1039/c5ob01644d), 2015-01-01
Supplement: c5ob01644d1.pdf [file c5ob01644d1.pdf]

## Supplementary Information

# A Pyrene-bridged Macrocage Showing No Excimer Fluorescence

Hirokuni Shionari,<sup>a</sup> Yusuke Inagaki,<sup>a</sup> Kentaro Yamaguchi,<sup>b</sup> and Wataru Setaka<sup>\*,a</sup>

<sup>a</sup> Division of Applied Chemistry, Faculty of Urban Environmental Sciences, Tokyo Metropolitan University, 1-1 Minami-Osawa, Hachioji, Tokyo 192-0397, Japan

<sup>b</sup> Faculty of Pharmaceutical Sciences at Kagawa Campus, Tokushima Bunri University, 1314-1 Shido, Sanuki, Kagawa 769-2193, Japan

### 1. Copies of Spectra for All New Compounds

|                                                                                                                              |           |
|------------------------------------------------------------------------------------------------------------------------------|-----------|
| Fig. S1. <sup>1</sup> H NMR spectrum of 2,7-bis(tri-9-decenylsilyl)pyrene ( <b>2</b> ) in CDCl <sub>3</sub> .                | ..... S2  |
| Fig. S2. <sup>13</sup> C NMR spectrum of 2,7-bis(tri-9-decenylsilyl)pyrene ( <b>2</b> ) in CDCl <sub>3</sub> .               | ..... S2  |
| Fig. S3. <sup>1</sup> H- <sup>13</sup> C hsqc NMR spectrum of ( <b>2</b> ) in CDCl <sub>3</sub> .                            | ..... S3  |
| Fig. S4. <sup>1</sup> H- <sup>13</sup> C hmbc NMR spectrum of ( <b>2</b> ) in CDCl <sub>3</sub> .                            | ..... S3  |
| Fig. S5. HRMS(ESI, positive) spectrum of 2,7-bis(tri-9-decenylsilyl)pyrene ( <b>2</b> )                                      | ..... S4  |
| Fig. S6. <sup>1</sup> H NMR spectrum of Molecular Gyrotop ( <b>1</b> ) in CDCl <sub>3</sub> .                                | ..... S5  |
| Fig. S7. <sup>13</sup> C NMR spectrum of Molecular Gyrotop ( <b>1</b> ) in CDCl <sub>3</sub> .                               | ..... S5  |
| Fig. S8. <sup>1</sup> H- <sup>13</sup> C hsqc NMR spectrum of Molecular Gyrotop ( <b>1</b> ) in CDCl <sub>3</sub> .          | ..... S6  |
| Fig. S9. <sup>1</sup> H- <sup>13</sup> C hmbc NMR spectrum of Molecular Gyrotop ( <b>1</b> ) in CDCl <sub>3</sub> .          | ..... S6  |
| Fig. S10. HRMS(ESI, positive) spectrum of Molecular Gyrotop ( <b>1</b> )                                                     | ..... S7  |
| Fig. S11. <sup>1</sup> H NMR spectrum of Molecular Gyrotop Isomer ( <b>1i</b> ) in CDCl <sub>3</sub> .                       | ..... S8  |
| Fig. S12. <sup>13</sup> C NMR spectrum of Molecular Gyrotop Isomer ( <b>1i</b> ) in CDCl <sub>3</sub> .                      | ..... S8  |
| Fig. S13. <sup>1</sup> H- <sup>13</sup> C hsqc NMR spectrum of Molecular Gyrotop Isomer ( <b>1i</b> ) in CDCl <sub>3</sub> . | ..... S9  |
| Fig. S14. <sup>1</sup> H- <sup>13</sup> C hmbc NMR spectrum of Molecular Gyrotop Isomer ( <b>1i</b> ) in CDCl <sub>3</sub> . | ..... S9  |
| Fig. S15. HRMS(ESI, positive) spectrum of Molecular Gyrotop Isomer ( <b>1i</b> )                                             | ..... S10 |
| Fig. S16. <sup>1</sup> H NMR spectrum of 2,7-bis(menylsilyl)pyrene ( <b>3</b> ) in CDCl <sub>3</sub> .                       | ..... S11 |
| Fig. S17. <sup>13</sup> C NMR spectrum of 2,7-bis(menylsilyl)pyrene ( <b>3</b> ) in CDCl <sub>3</sub> .                      | ..... S11 |
| Fig. S18. <sup>1</sup> H- <sup>13</sup> C hsqc NMR spectrum of 2,7-bis(menylsilyl)pyrene ( <b>3</b> ) in CDCl <sub>3</sub> . | ..... S12 |
| Fig. S19. <sup>1</sup> H- <sup>13</sup> C hmbc NMR spectrum of 2,7-bis(menylsilyl)pyrene ( <b>3</b> ) in CDCl <sub>3</sub> . | ..... S12 |
| Fig. S20. HRMS(ESI, positive) spectrum of 2,7-bis(menylsilyl)pyrene ( <b>3</b> )                                             | ..... S13 |

### 2. Details of X-ray Crystallography

|                                                                                               |           |
|-----------------------------------------------------------------------------------------------|-----------|
| Table S1. Crystal Data of <b>1</b> and <b>3</b>                                               | ..... S14 |
| Table S2. Parameters for Weighted Least-Squares Planes through the Starred Atoms for <b>1</b> | ..... S15 |

### 3. Details of Fluorescence lifetime measurements study

|                                                                                                                                                      |           |
|------------------------------------------------------------------------------------------------------------------------------------------------------|-----------|
| Fig. S21. Normalized fluorescence decay traces of naphthalenes: (a) pyrene; (b) <b>3</b> ; (c) <b>1</b> ; (d) <b>1i</b> .                            | ..... S16 |
| Fig. S22. Fluorescence spectra of pyrenes in the presence of nitrobenzene: (a) pyrene, (b) <b>3</b> , (c) <b>1</b> , (d) <b>1i</b> .                 | ..... S17 |
| Fig. S23. Normalized fluorescence decay traces of pyrenes in the presence of nitrobenzene: (a) pyrene, (b) <b>3</b> , (c) <b>1</b> , (d) <b>1i</b> . | ..... S18 |

# 1. Copies of Spectra for All New Compounds

## a. Spectra of 2,7-bis(tri-9-decenylsilyl)pyrene (2)

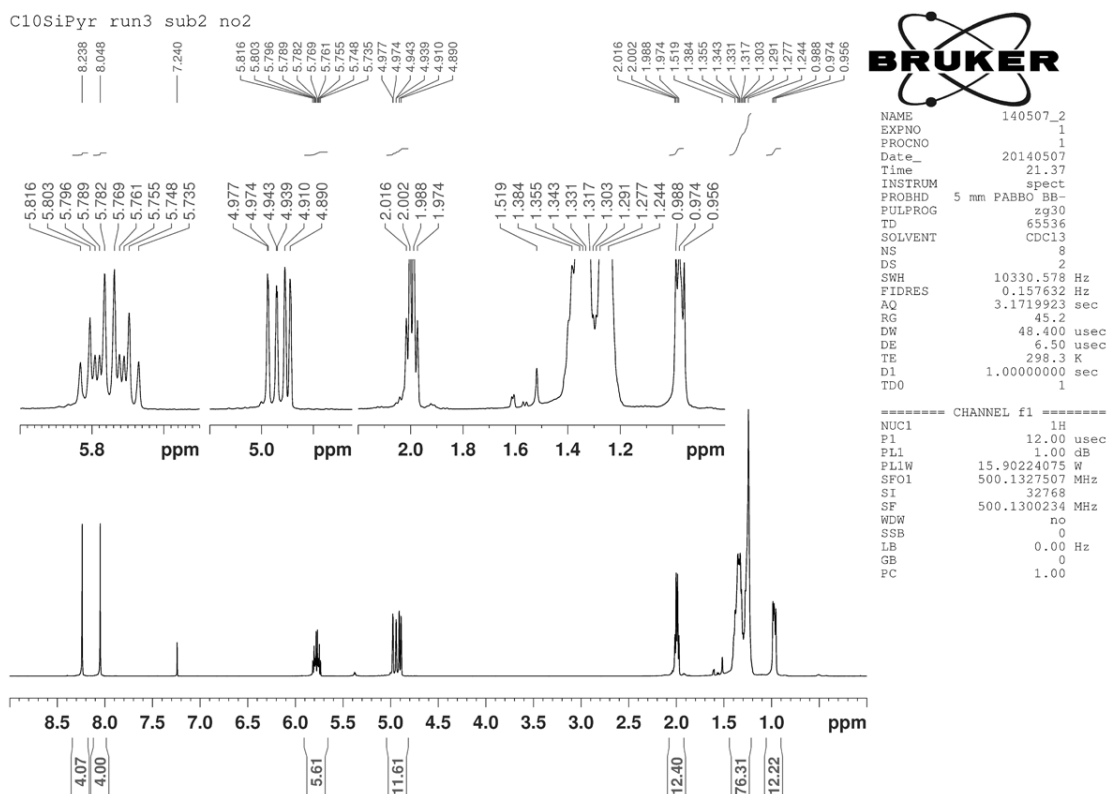

Fig. S1.  $^1\text{H}$  NMR spectrum of 2,7-bis(tri-9-decenylsilyl)pyrene (2) in  $\text{CDCl}_3$ .

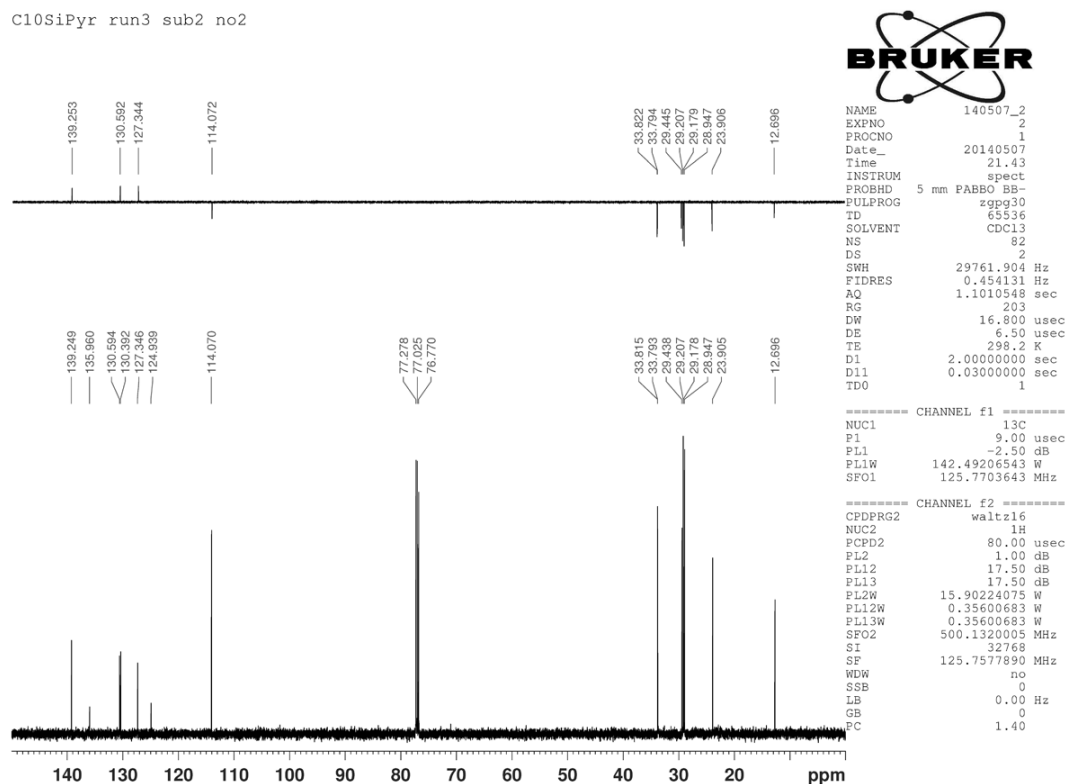

Fig. S2.  $^{13}\text{C}$  NMR spectrum of 2,7-bis(tri-9-decenylsilyl)pyrene (2) in  $\text{CDCl}_3$ .

C10SiPyr run1 sub2 no1

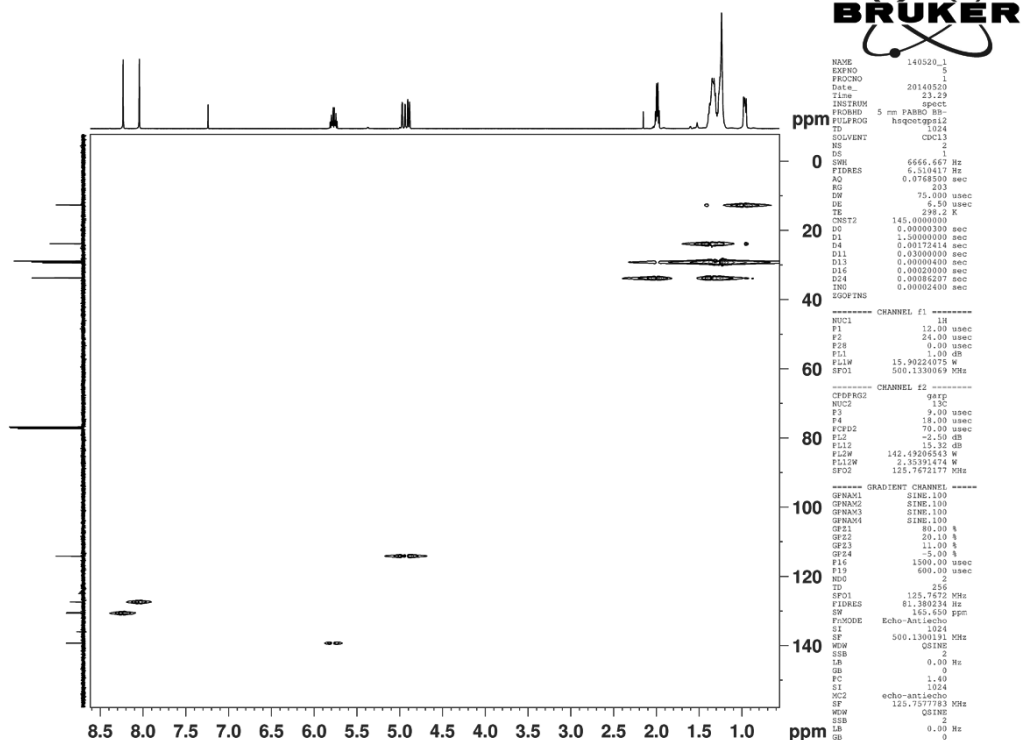

Fig. S3.  $^1\text{H}$ - $^{13}\text{C}$  hsqc NMR spectrum of 2,7-bis(tri-9-decenylsilyl)pyrene (2) in  $\text{CDCl}_3$ .

C10SiPyr run1 sub2 no1

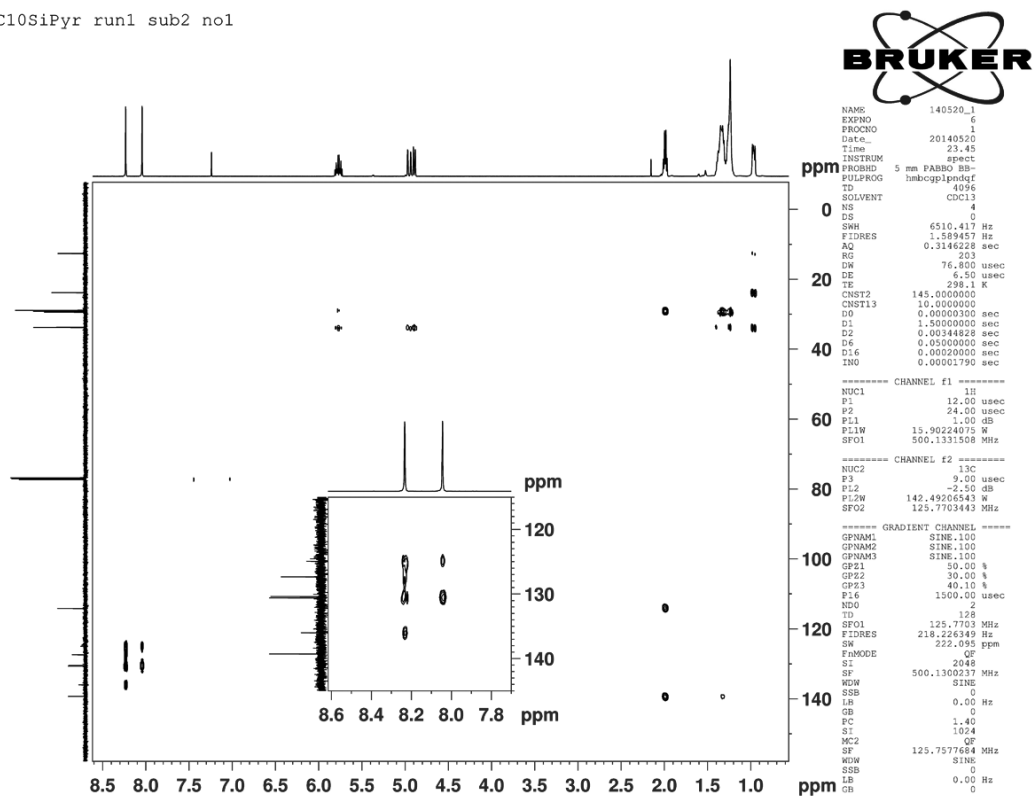

Fig. S4.  $^1\text{H}$ - $^{13}\text{C}$  hmbc NMR spectrum of 2,7-bis(tri-9-decenylsilyl)pyrene (2) in  $\text{CDCl}_3$ .

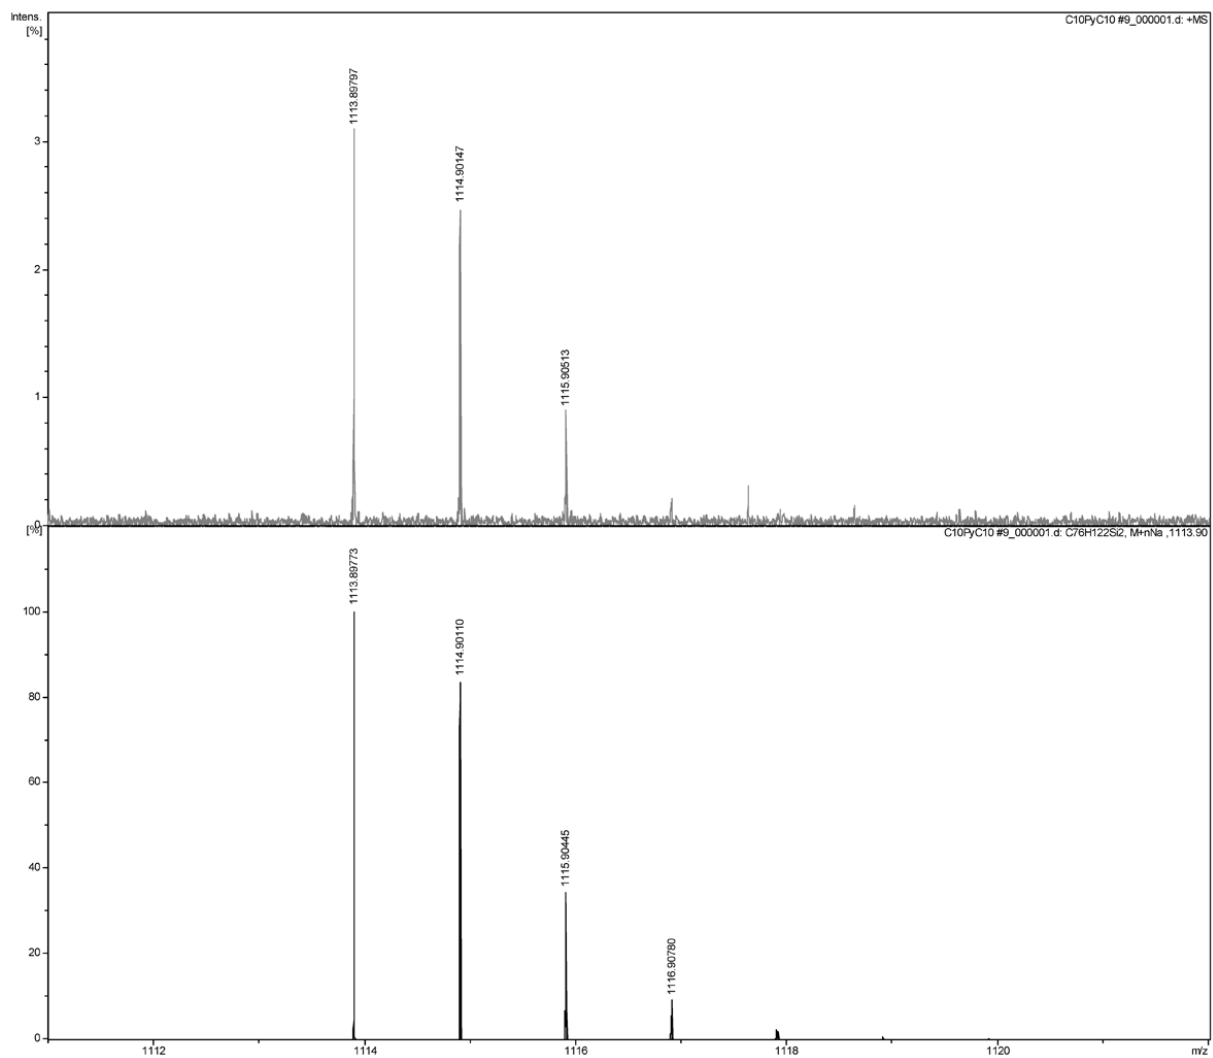

**Fig. S5.** HRMS(ESI, positive) spectrum of 2,7-bis(tri-9-decenylsilyl)pyrene (**2**): top; obsd., bottom; calcd.

## b. Spectra of Molecular Gyrotop (1)

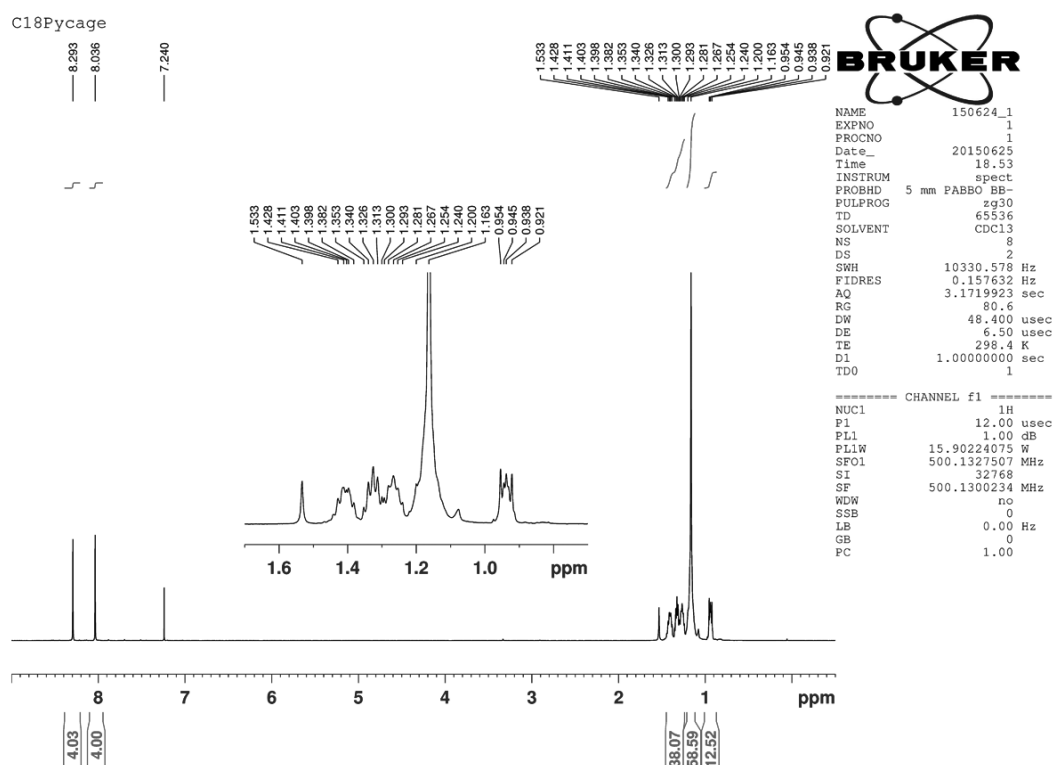

Fig. S6.  $^1\text{H}$  NMR spectrum of Molecular Gyrotop (1) in  $\text{CDCl}_3$ .

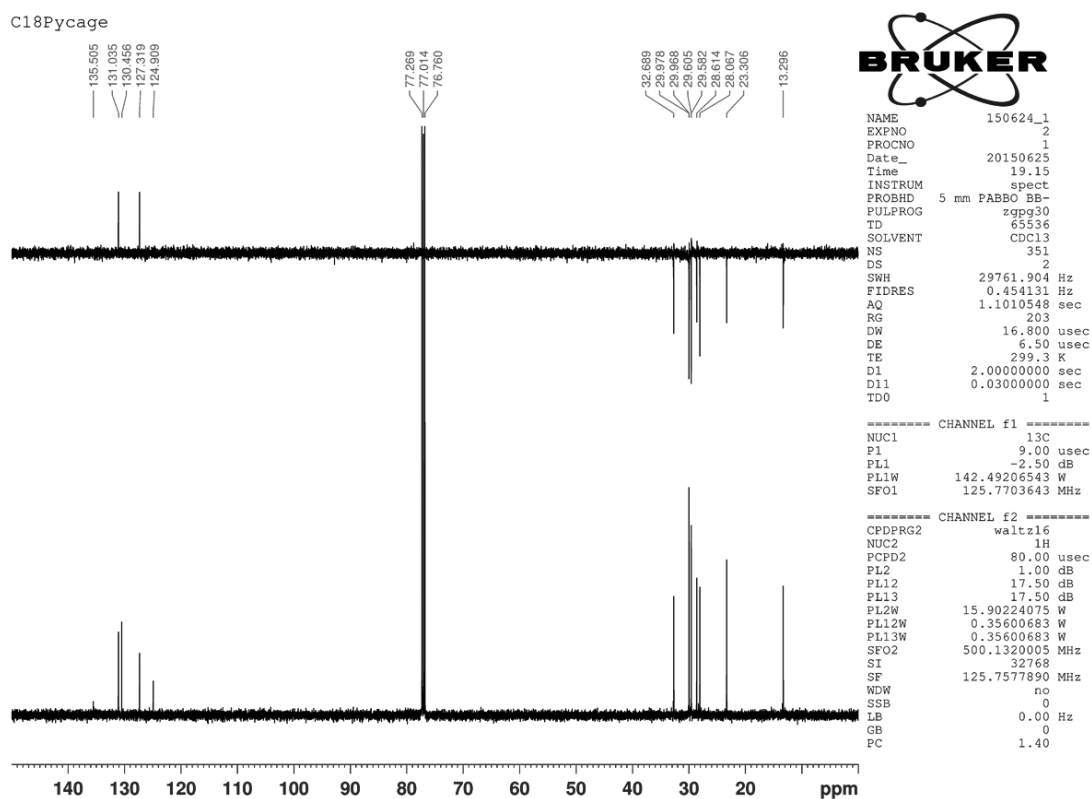

Fig. S7.  $^{13}\text{C}$  NMR spectrum of Molecular Gyrotop (1) in  $\text{CDCl}_3$ .

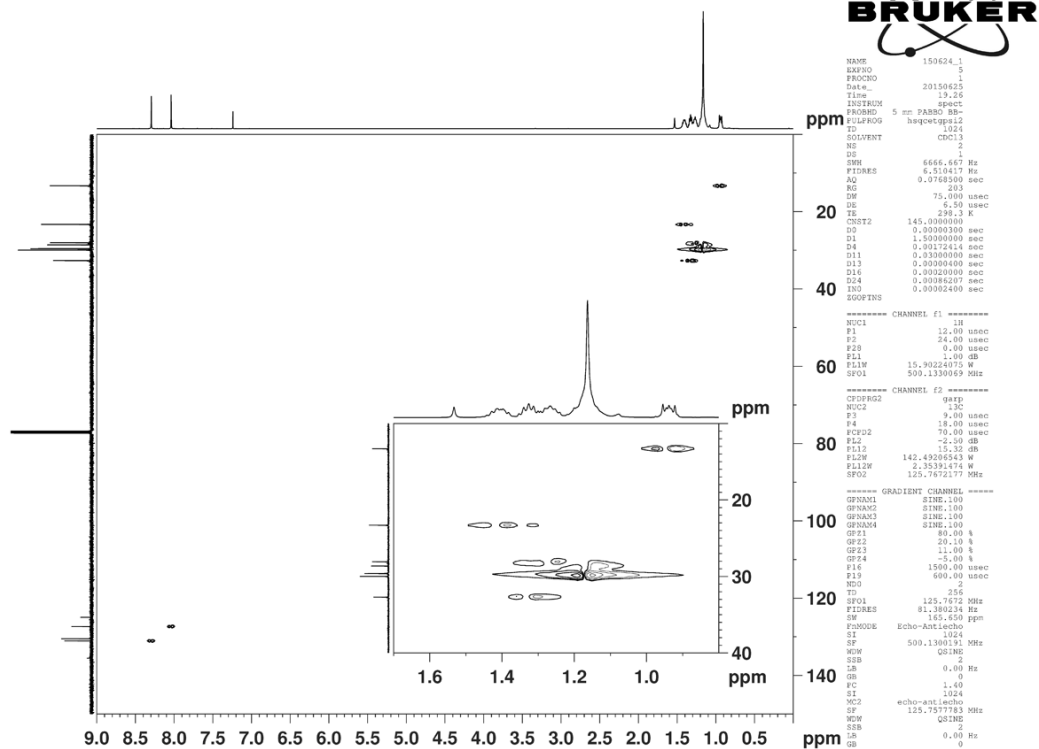Fig. S8.  $^1\text{H}$ - $^{13}\text{C}$  hsqc NMR spectrum of Molecular Gyrotop (**1**) in  $\text{CDCl}_3$ .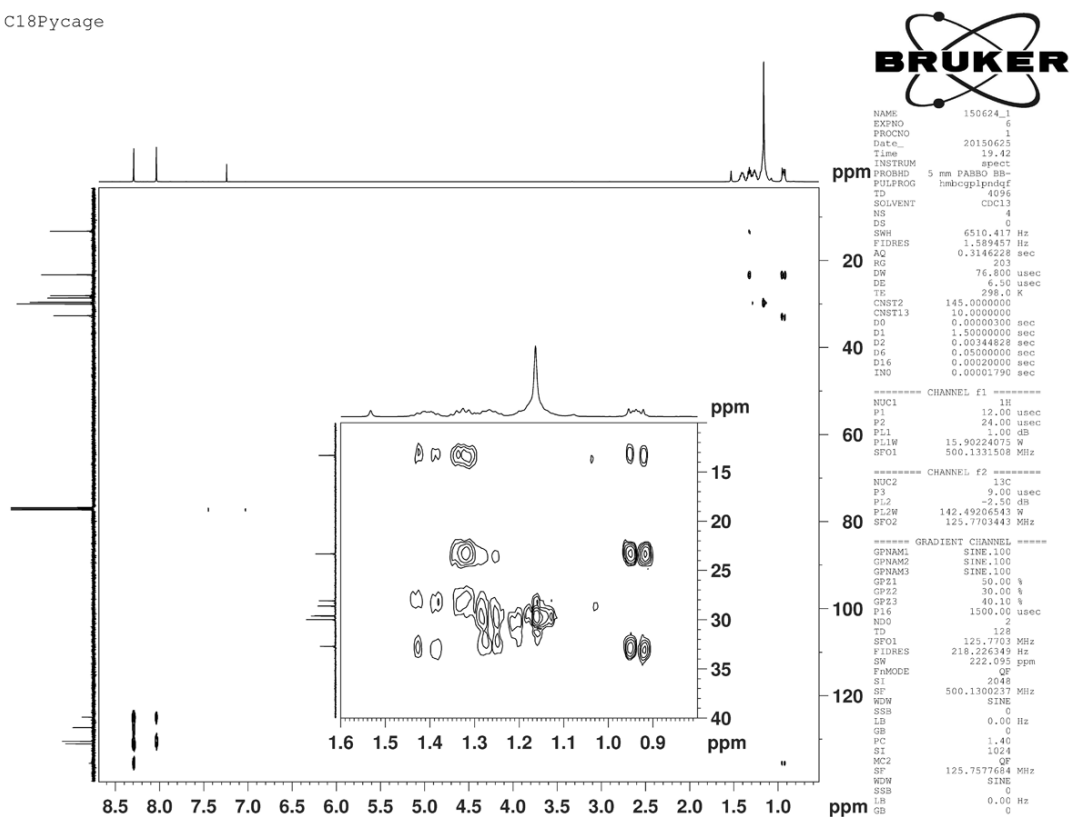Fig. S9.  $^1\text{H}$ - $^{13}\text{C}$  hmbc NMR spectrum of Molecular Gyrotop (**1**) in  $\text{CDCl}_3$ .

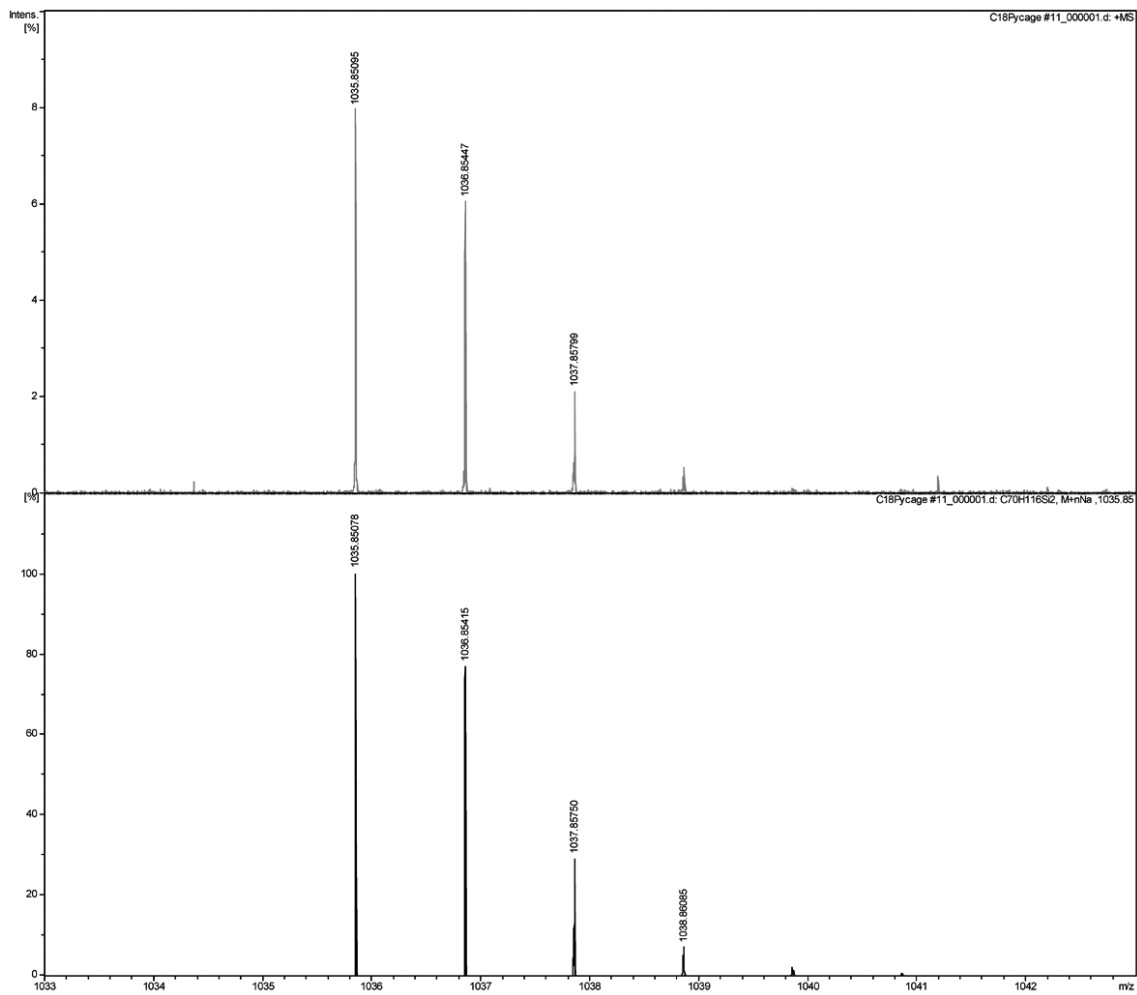

**Fig. S10.** HRMS(ESI, positive) spectrum of Molecular Gyrotop (**1**): top; obsd., bottom; calcd.

### c. Spectra of Molecular Gyrotop Isomer (1i)

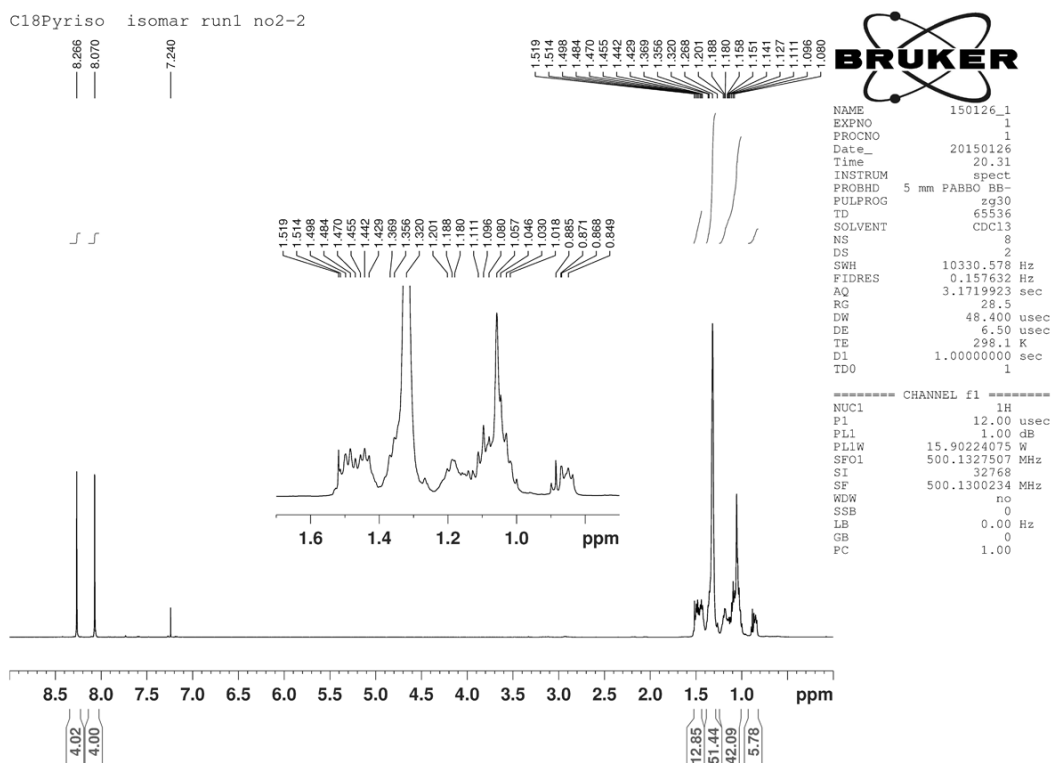

Fig. S11.  $^1\text{H}$  NMR spectrum of Molecular Gyrotop Isomer (**1i**) in  $\text{CDCl}_3$ .

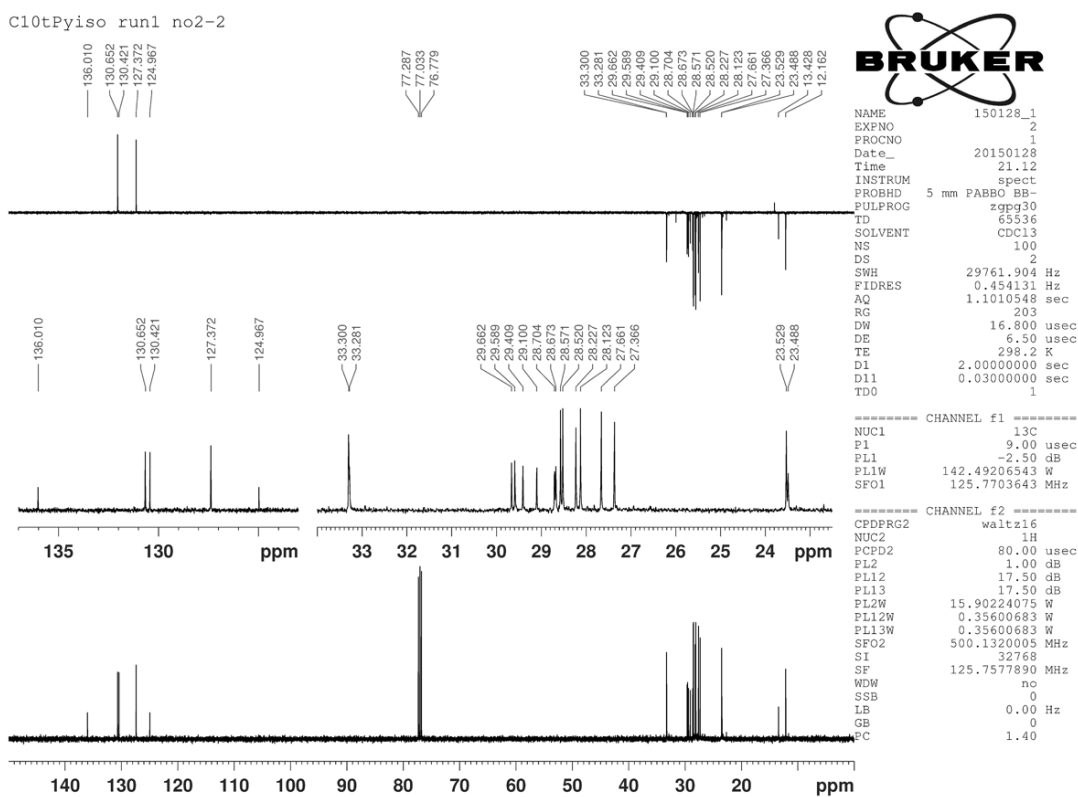

Fig. S12.  $^{13}\text{C}$  NMR spectrum of Molecular Gyrotop Isomer (**1i**) in  $\text{CDCl}_3$ .



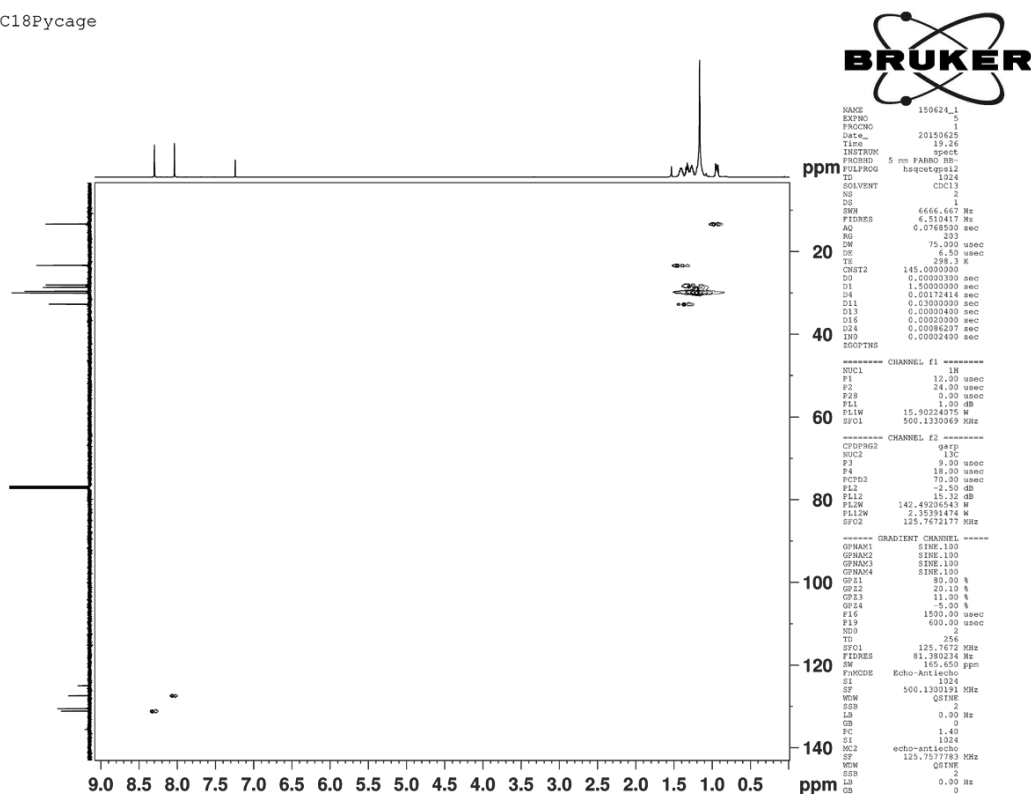Fig. S13.  $^1\text{H}$ - $^{13}\text{C}$  hsqc NMR spectrum of Molecular Gyrotop Isomer (**1i**) in  $\text{CDCl}_3$ .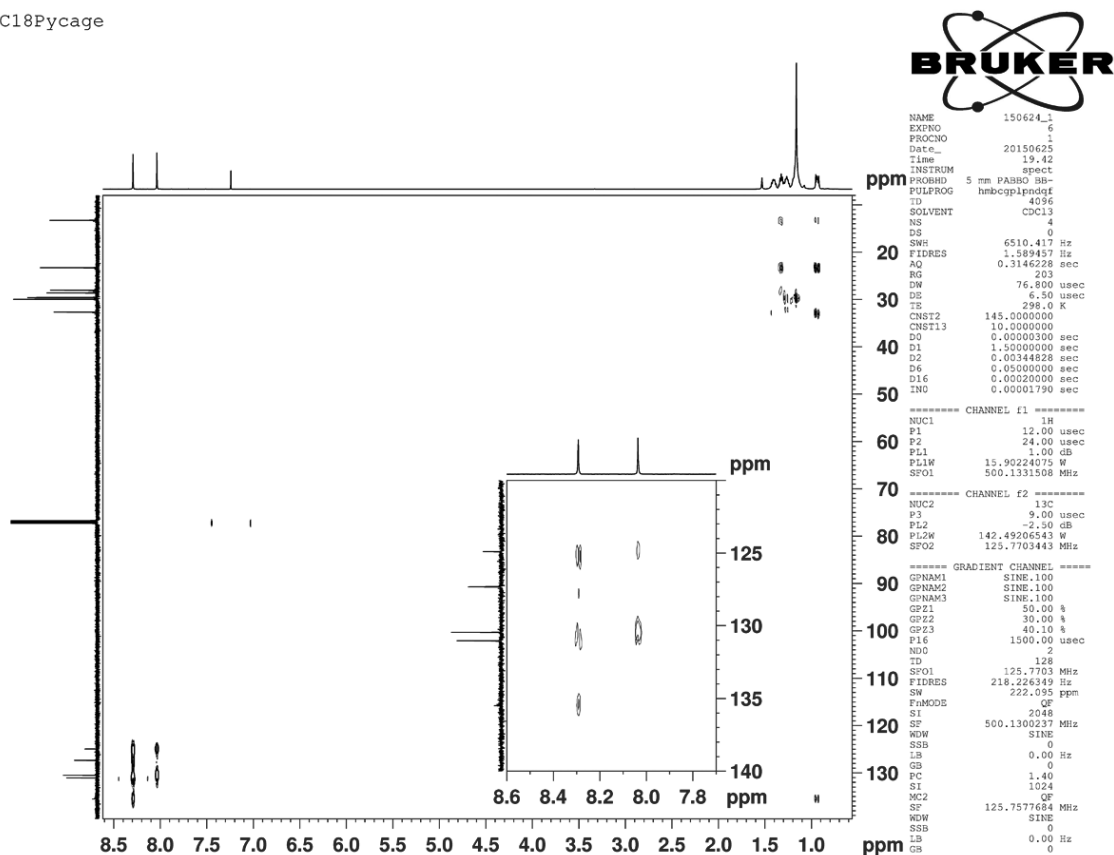Fig. S14.  $^1\text{H}$ - $^{13}\text{C}$  hmbc NMR spectrum of Molecular Gyrotop Isomer (**1i**) in  $\text{CDCl}_3$ .

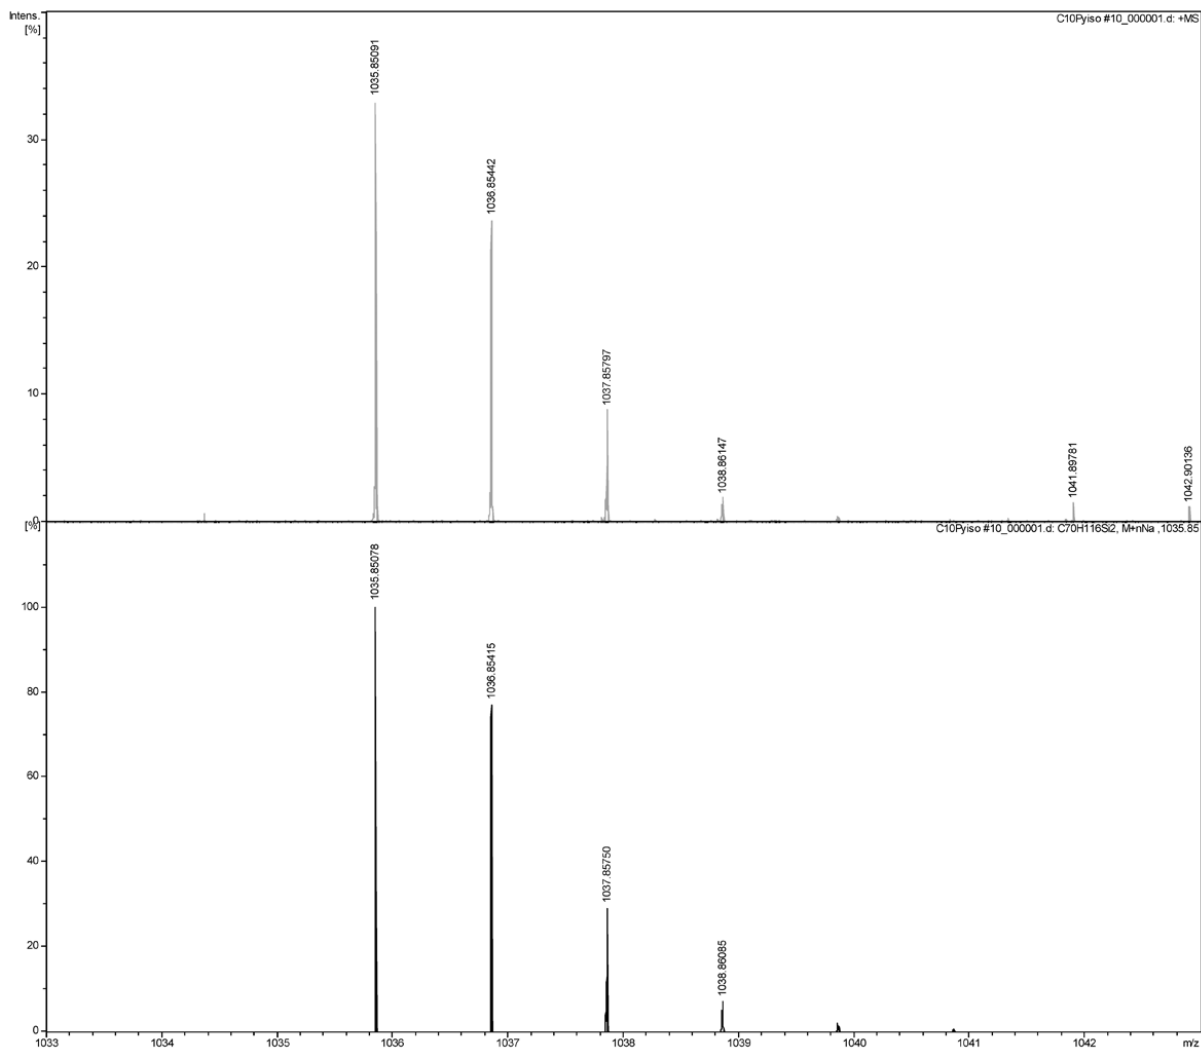

**Fig. S15.** HRMS(ESI, positive) spectrum of Molecular Gyrotop Isomer (**1i**): top; obsd., bottom; calcd.

### d. Spectra of 2,7-bis(menylsilyl)pyrene (3)

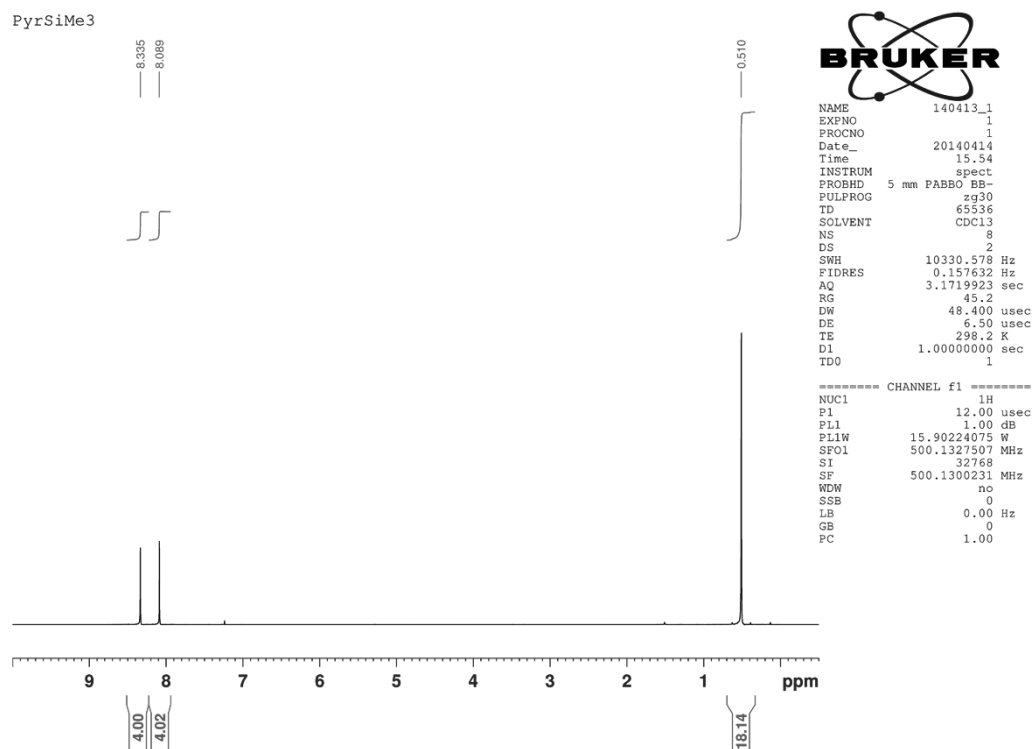

**Fig. S16.** <sup>1</sup>H NMR spectrum of 2,7-bis(menylsilyl)pyrene (3) in CDCl<sub>3</sub>.

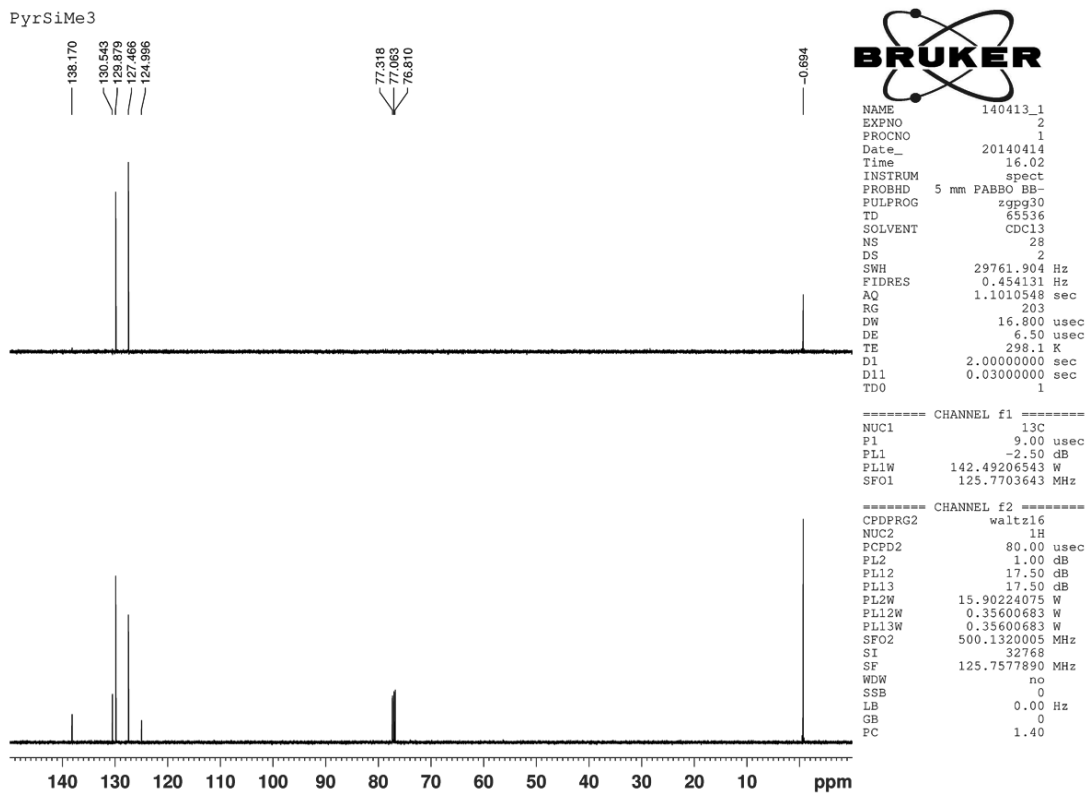

**Fig. S17.** <sup>13</sup>C NMR spectrum of 2,7-bis(menylsilyl)pyrene (3) in CDCl<sub>3</sub>.

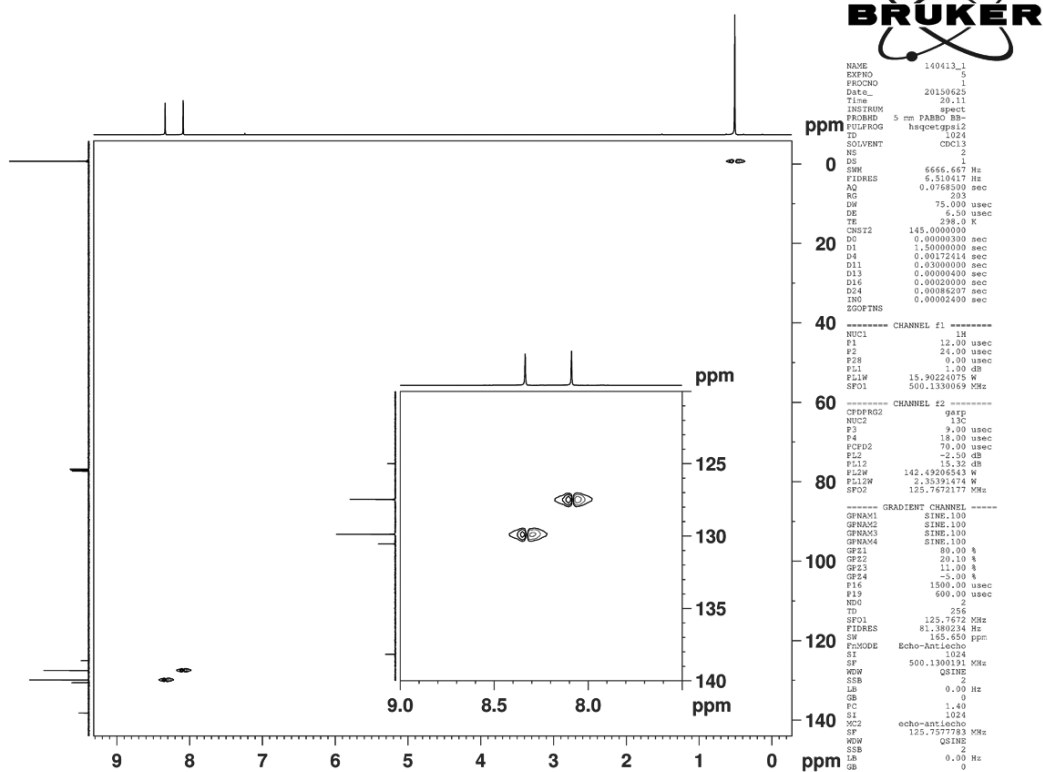

Fig. S18.  $^1\text{H}$ - $^{13}\text{C}$  hsqc NMR spectrum of 2,7-bis(menylsilyl)pyrene (**3**) in  $\text{CDCl}_3$ .

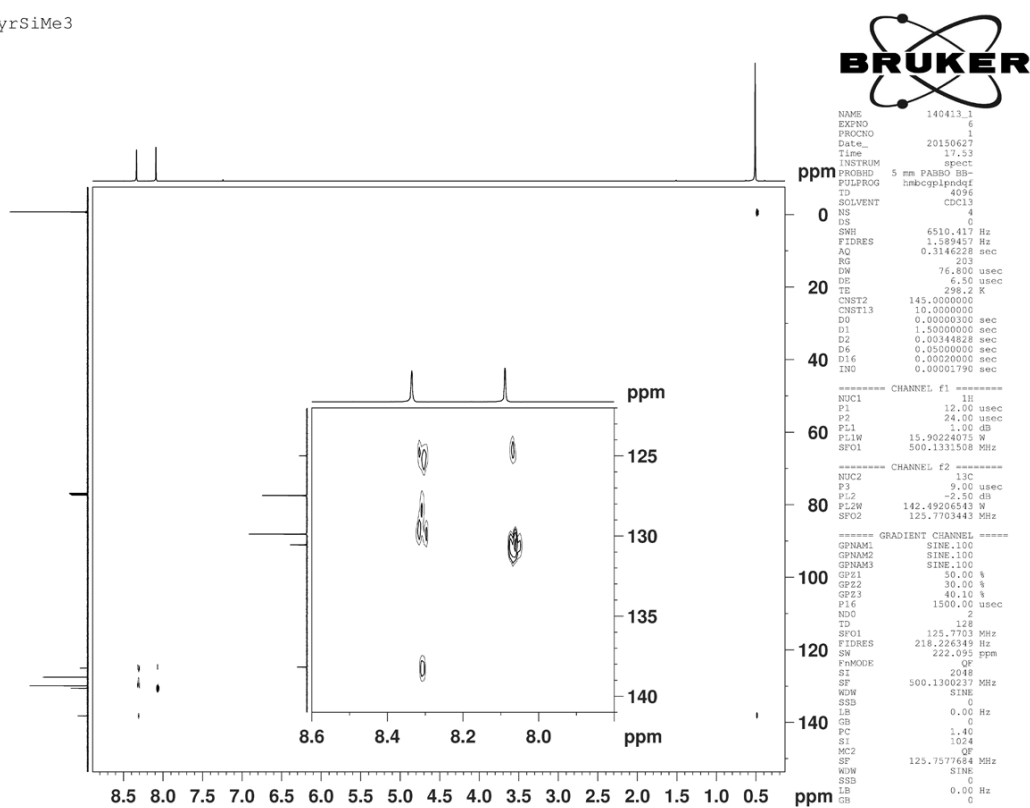

Fig. S19.  $^1\text{H}$ - $^{13}\text{C}$  hmhc NMR spectrum of 2,7-bis(menylsilyl)pyrene (**3**) in  $\text{CDCl}_3$ .

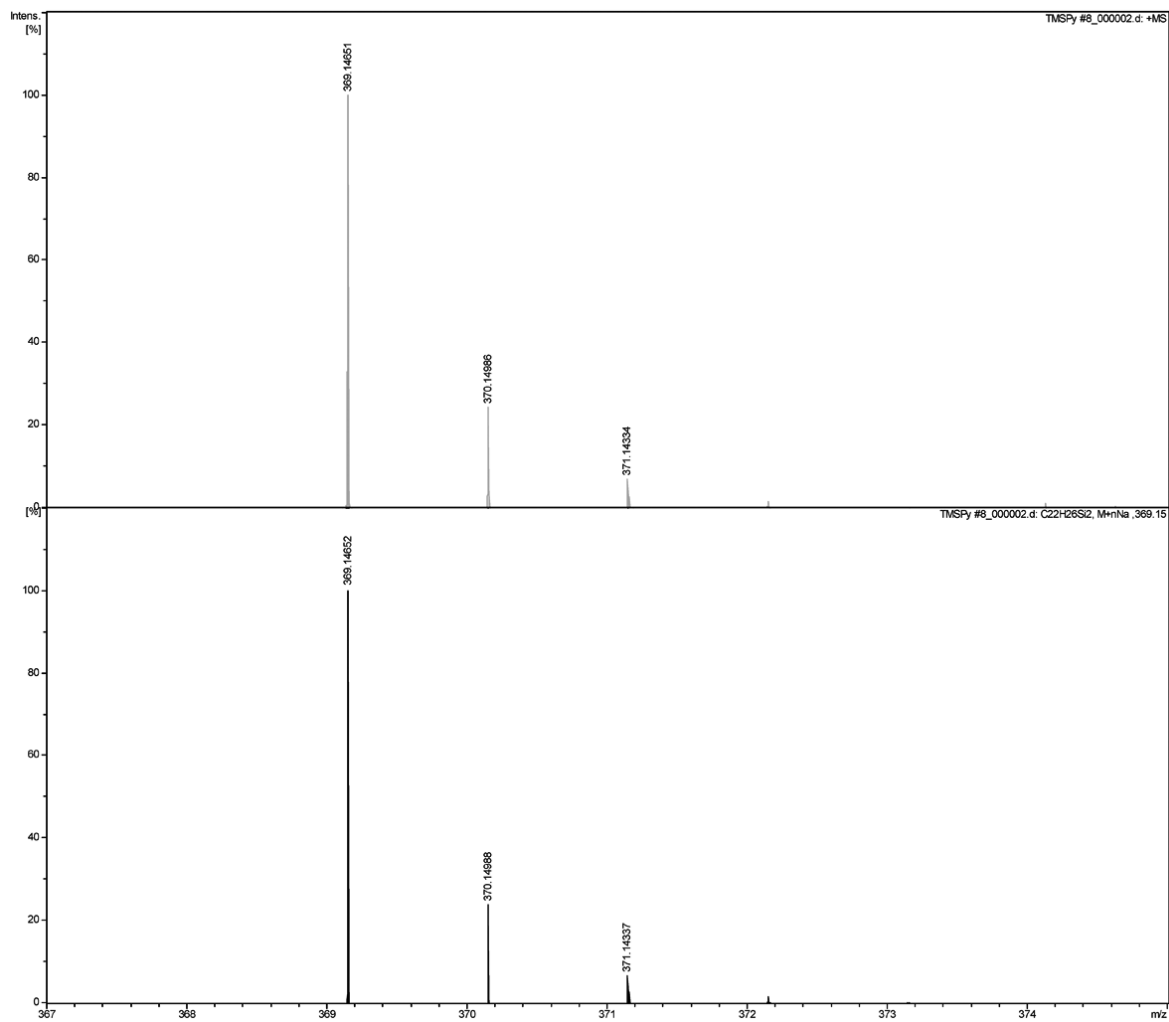

**Fig. S20.** HRMS(ESI, positive) spectrum of 2,7-bis(menylsilyl)pyrene (**3**): top; obsd., bottom; calcd.

### 3. Details of X-ray Crystallography

**Table S1.** Crystal Data of **1** and **3**

|                                                       | <b>1</b>                                                      | <b>3</b>                                                   |                         |
|-------------------------------------------------------|---------------------------------------------------------------|------------------------------------------------------------|-------------------------|
| <b>CCDC #</b>                                         | 1415849                                                       | 1415850                                                    |                         |
| <b>Compound Name</b>                                  | C18 Pyrene-gyrotop                                            | 2,7-Bis(trimethylsilyl)pyrene                              |                         |
| <b>Empirical formula</b>                              | C <sub>70</sub> H <sub>116</sub> Si <sub>2</sub>              | C <sub>22</sub> H <sub>26</sub> Si <sub>2</sub>            |                         |
| <b>Cryst shape</b>                                    | prism                                                         | prism                                                      |                         |
| <b>Cryst color</b>                                    | colorless                                                     | colorless                                                  |                         |
| <b>Cryst size</b>                                     | 0.30 x 0.20 x 0.20 mm <sup>3</sup>                            | 0.50 x 0.30 x 0.20 mm <sup>3</sup>                         |                         |
| <b>Formula weight / g mol<sup>-1</sup></b>            | 1013.8                                                        | 346.61                                                     |                         |
| <b>Crystal system</b>                                 | Triclinic                                                     | Monoclinic                                                 |                         |
| <b>Space group</b>                                    | <i>P</i> -1                                                   | <i>P</i> 2 <sub>1</sub> / <i>c</i>                         |                         |
| <b>Z</b>                                              | 2                                                             | 2                                                          |                         |
| <b>Temperature / K</b>                                | 100                                                           | 100                                                        |                         |
| <b>Cell parameter</b>                                 | <i>a</i>                                                      | 12.173(3) Å                                                | 6.3540(12) Å            |
|                                                       | <i>b</i>                                                      | 17.375(4) Å                                                | 16.626(3) Å             |
|                                                       | <i>c</i>                                                      | 18.275(4) Å                                                | 9.3688(17) Å            |
|                                                       | $\alpha$                                                      | 61.920(3)°                                                 | 90°                     |
|                                                       | $\beta$                                                       | 71.547(3)°                                                 | 100.456(2)°             |
|                                                       | $\gamma$                                                      | 87.263(3)°                                                 | 90°                     |
|                                                       | <i>V</i>                                                      | 3211.3(14) Å <sup>3</sup>                                  | 973.3(3) Å <sup>3</sup> |
| <b>Calculated density</b>                             | 1.048 Mg/m <sup>3</sup>                                       | 1.183 Mg/m <sup>3</sup>                                    |                         |
| <b>F(000)</b>                                         | 1128                                                          | 372                                                        |                         |
| <b>Absorption coefficient</b>                         | 0.093 mm <sup>-1</sup>                                        | 0.183 mm <sup>-1</sup>                                     |                         |
| <b><math>\theta</math> range for collec (deg)</b>     | 1.34 to 28.71°                                                | 2.45 to 28.06°                                             |                         |
| <b>Index ranges</b>                                   | -14<= <i>h</i> <=16, -17<= <i>k</i> <=22, -19<= <i>l</i> <=23 | -7<= <i>h</i> <=8, -15<= <i>k</i> <=21, -9<= <i>l</i> <=11 |                         |
| <b>Reflections collected</b>                          | 18533                                                         | 5274                                                       |                         |
| <b>Independent reflections</b>                        | 14243 [R(int) = 0.0210]                                       | 2118 [R(int) = 0.0188]                                     |                         |
| <b>Completeness</b>                                   | 97.8 %                                                        | 99.7 %                                                     |                         |
| <b>Goodness-of-fit on F<sup>2</sup></b>               | 1.043                                                         | 1.056                                                      |                         |
| <b>Final R indices [I&gt;2<math>\sigma</math>(I)]</b> | R1 = 0.0575, wR2 = 0.1454                                     | R1 = 0.0331, wR2 = 0.0875                                  |                         |
| <b>R indices (all data)</b>                           | R1 = 0.0688, wR2 = 0.1553                                     | R1 = 0.0375, wR2 = 0.0905                                  |                         |
| <b>Largest diff. peak and hole</b>                    | 0.602 and -0.356 e.Å <sup>-3</sup>                            | 0.361 and -0.195 e.Å <sup>-3</sup>                         |                         |

**Table S2.** Parameters for Weighted Least-Squares Planes through the Starred Atoms for **1**

(Nardelli, Musatti, Domiano & Andreetti Ric.Sci.(1965),15(II-A),807).

Equation of the plane:  $m_1 * X + m_2 * Y + m_3 * Z = d$

Plane 1

$m_1 = -0.99836(0.00000)$

$m_2 = 0.04105(0.00031)$

$m_3 = -0.04002(0.00007)$

$D = -8.69372(0.00246)$

| Atom |   | d       | s      | d/s     | (d/s)**2 |
|------|---|---------|--------|---------|----------|
| C01  | * | 0.0032  | 0.0017 | 1.882   | 3.544    |
| C02  | * | 0.0327  | 0.0018 | 17.854  | 318.761  |
| C03  | * | 0.0546  | 0.0018 | 29.838  | 890.302  |
| C04  | * | 0.0536  | 0.0017 | 31.210  | 974.078  |
| C05  | * | 0.0324  | 0.0018 | 17.692  | 313.012  |
| C06  | * | -0.0012 | 0.0018 | -0.669  | 0.448    |
| C07  | * | 0.0533  | 0.0017 | 31.067  | 965.153  |
| C08  | * | 0.0356  | 0.0018 | 19.464  | 378.842  |
| C09  | * | -0.0087 | 0.0020 | -4.430  | 19.628   |
| C10  | * | -0.0293 | 0.0018 | -16.016 | 256.498  |
| C11  | * | 0.0142  | 0.0018 | 7.689   | 59.123   |
| C12  | * | 0.0507  | 0.0018 | 27.719  | 768.343  |
| C13  | * | 0.0596  | 0.0022 | 27.206  | 740.184  |
| C14  | * | 0.0472  | 0.0022 | 21.569  | 465.230  |
| C15  | * | 0.0573  | 0.0021 | 27.632  | 763.513  |
| C16  | * | 0.0399  | 0.0021 | 19.222  | 369.478  |
| Si01 | * | -0.0272 | 0.0006 | -44.650 | 1993.658 |
| Si02 | * | -0.0234 | 0.0006 | -38.429 | 1476.806 |

---

---

Sum((d/s)\*\*2) for starred atoms 10756.598

Chi-squared at 95% for 15 degrees of freedom: 25.00

The group of atoms deviates significantly from planarity

## 4. Details of Fluorescence Study

### a. Fluorescence lifetime measurement

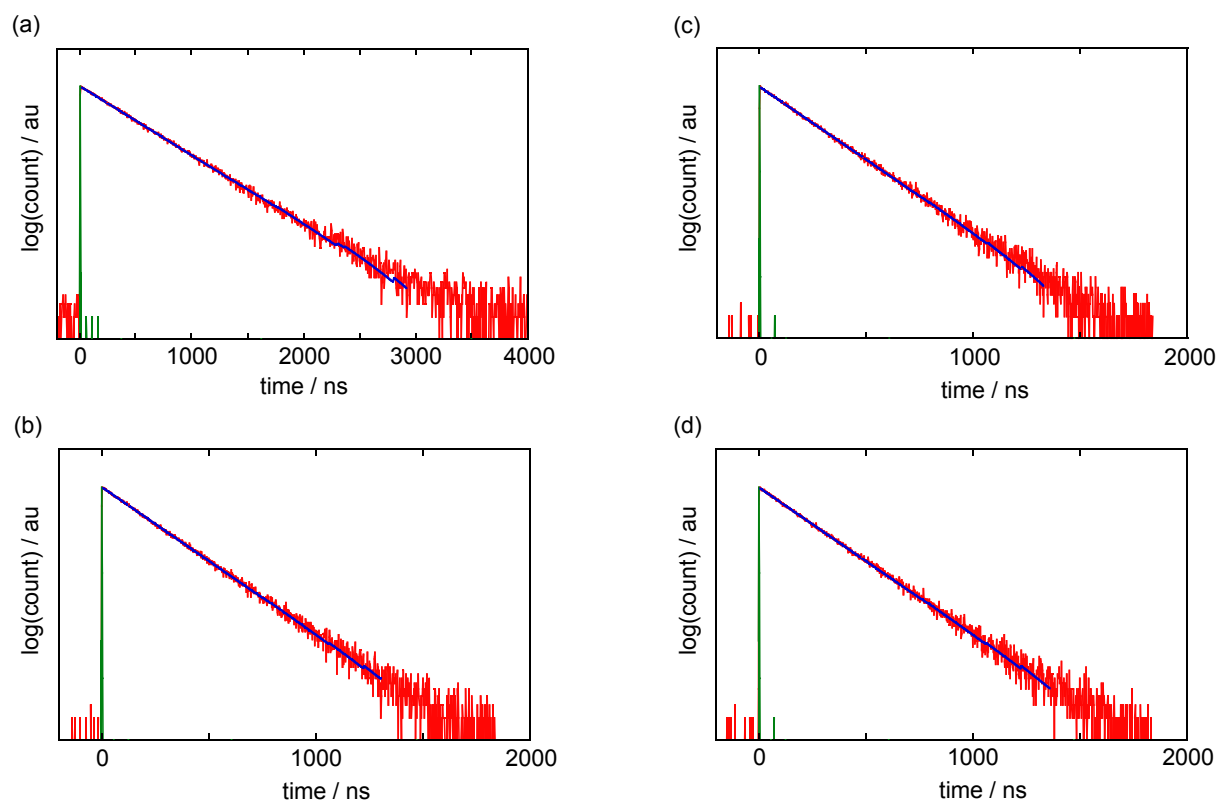

**Fig. S21.** Normalized fluorescence decay traces of pyrenes [red line; observed intensity, green line; light pulse, blue line, line fitting] (conditions: 1  $\mu$ M, 296 K, ex. 340 nm, obs. 383 - 385 nm) : (a) pyrene; (b) **3**; (c) **1**; (d) **1i**.



## b. Fluorescence quenching by nitrobenzene

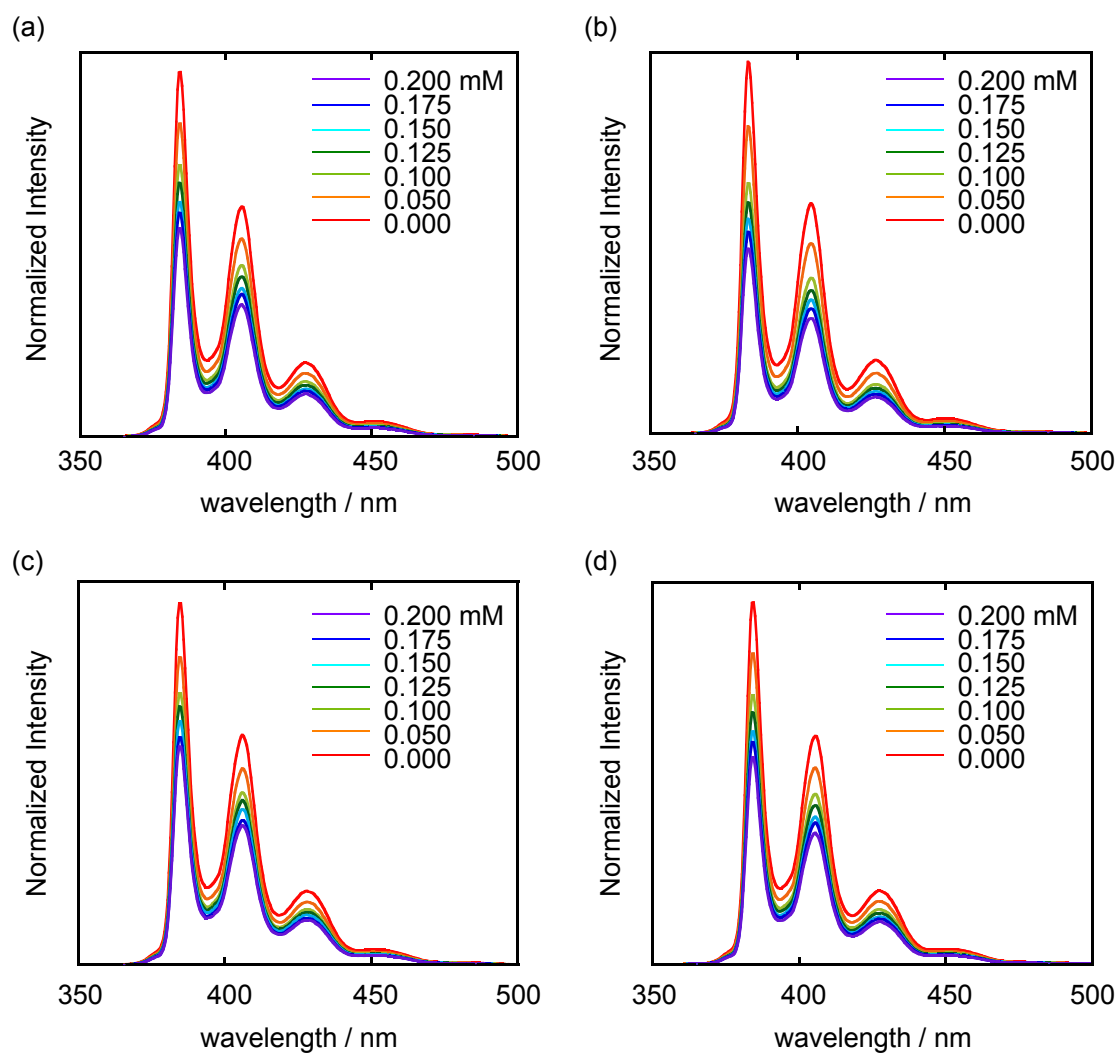

**Fig. S22.** Fluorescence spectra of  $10 \times 10^{-6}$  M pyrenes in hexane at rt in the presence of increasing concentrations of nitrobenzene: (a) pyrene, (b) **3**, (c) **1**, (d) **1i**.

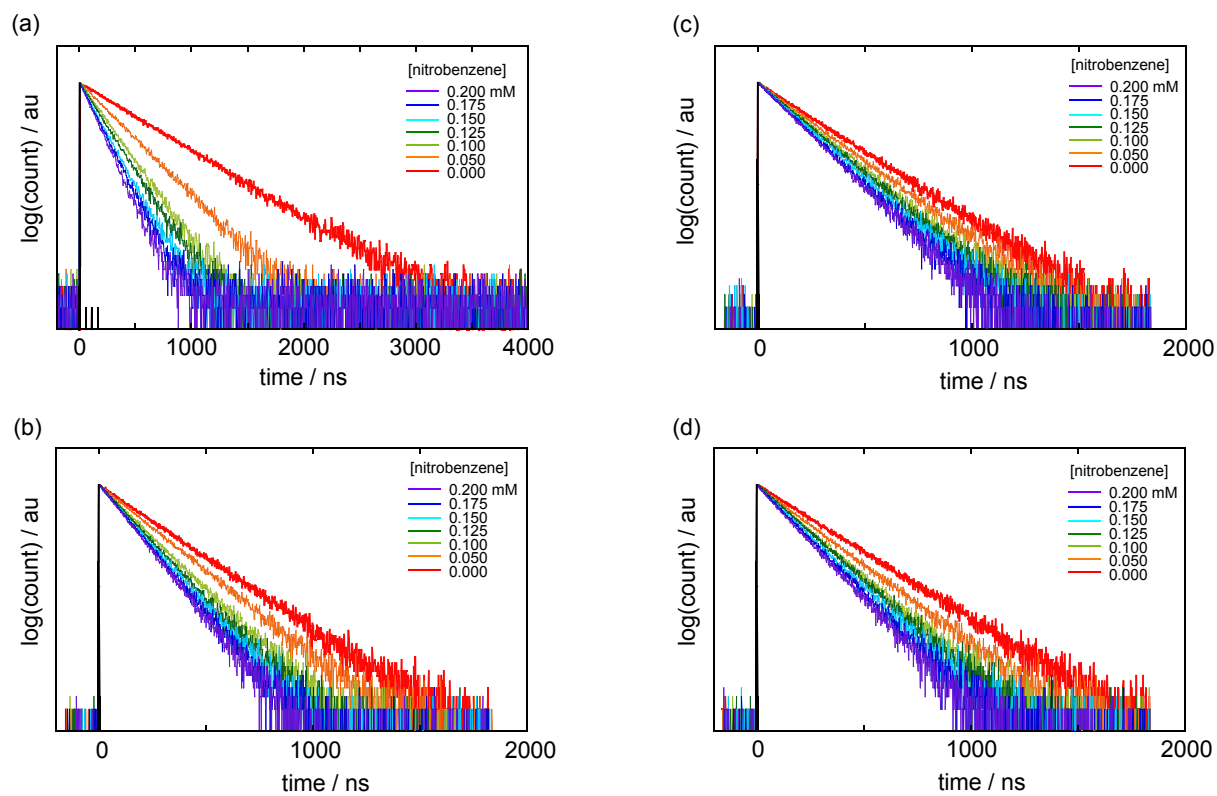

**Fig. S23.** Normalized fluorescence decay traces of pyrenes in the presence of nitrobenzene as a quencher [black line; light pulse] (concentrations of substrates 1  $\mu$ M): (a) pyrene, (b) **3**, (c) **1**, (d) **1i**.
